# Supplementary material for: Spatiotemporal vitrimerization of a thermosetting polymer using a photo-latent catalyst for transesterification
Source: Royal Society of Chemistry journal article supplement (doi:10.1039/d1ta10841g), 2022-01-01
Supplement: d1ta10841g1.pdf [file d1ta10841g1.pdf]

**Supplementary Information for:**

**Spatiotemporal Vitrimerization of a Thermosetting Polymer  
using a Photo-Latent Catalyst for Transesterification**

*Jinyoung Park<sup>a</sup>, Hyeong Yong Song<sup>b</sup>, Subi Choi<sup>a</sup>, Suk-kyun Ahn<sup>a,c</sup>, Kyu Hyun<sup>a</sup>, and Chae Bin Kim<sup>a,c\*</sup>*

*<sup>a</sup>School of Chemical Engineering, Pusan National University, Busan, 46241 Republic of Korea*

*<sup>b</sup>Institute for Environment and Energy, Pusan National University, Busan 46241, Republic of Korea*

*<sup>c</sup>Department of Polymer Science and Engineering, Pusan National University, Busan, 46241 Republic of Korea*

\*Corresponding Author. E-mail address: [cbkim@pusan.ac.kr](mailto:cbkim@pusan.ac.kr)

## Methods

**Materials.** Pentaerythritol triacrylate (PETA, technical grade), pentaerythritol tetrakis(3-mercaptopropionate) (PETMP, >95%), and TPS were purchased from Sigma-Aldrich (Korea). Acetone (99.5%) was purchased from Samchun Pure Chemical Co. Ltd. (Korea). Benzoyl peroxide (74%) was purchased from Daejung Chemicals & Metals Co. Ltd. (Korea). Acetonitrile (>99.5%) and methyl red (>98.0%) were purchased from TCI (Korea). All chemicals were used directly without further purification unless otherwise specified.

**Instrumentation.** ATR-FTIR spectra were recorded on a Nicolet 6700 (Thermo Fisher Scientific, USA) spectrometer equipped with a diamond ATR probe. DSC analyses (DSC25, TA Instruments, USA) were performed under a nitrogen atmosphere at a heating rate of 10 °C/min. TGA (Q50, TA Instruments, USA) was performed under a nitrogen atmosphere or air at a heating rate of 10 °C/min. DMA (DMA 850, TA Instruments, USA) was conducted at a ramp rate of 3 °C/min, a frequency of 1 Hz, and a fixed oscillatory strain of 0.1%. The tensile strengths of the model polymer materials were measured using a UTM (LRX plus, AMETEK) at a crosshead speed of 100 mm/min. UV–Visible spectra were obtained using a Mega-800 (SCINCO, Korea) spectrophotometer. All linear viscoelastic properties were measured using a strain-controlled rotational rheometer (ARES-G2, TA Instruments) with 13 mm parallel plates. The frequency sweep measurements were taken in the temperature range of 30–180 °C (10 °C intervals) at a strain amplitude of 0.5%, which lay in the linear regime. All measurements were taken in a nitrogen environment to prevent oxidative degradation. For each sample, a pseudo-master curve was constructed by applying the time-temperature superposition (TTS) principle at a  $T_{\text{ref}}$  of 70 °C.

**Model polymer synthesis.** A solution of BPO and TPS PAG dissolved in acetone was mixed with PETMP and PETA in a 20 mL vial. The molar ratio between the thiol and acrylate was

maintained at 1:1. The amount of BPO with respect to the total monomer weight was 1 wt.%, whereas that of TPS with respect to acrylate (or thiol) was 7 mol%. The mixture was vigorously stirred using an applicator at room temperature, followed by vacuum drying at room temperature for 12 h and finally heating at 60 °C for 3 h to yield the prepolymer. The prepolymer was then simultaneously cured and molded into a film by heat-pressing at 180 °C and 15 MPa for 3 h. Thickness for the samples was kept in 0.3 mm, unless otherwise noted.

***Light exposure.*** Broadband UV irradiation (OmniCure S1500 Spot UV Curing System, Canada) was conducted at room temperature with an output wavelength ranging from 200 to 500 nm. A working distance of 30 mm was used and the light intensity was determined to be 85 mW/cm<sup>2</sup> using a radiometer (PM100D, Thorlabs, USA) equipped with an S405C thermal power sensor head.

***Self-healing experiments.*** Scratches were made using a razor blade on the sample frozen using liquid nitrogen. Upon heating at 180 °C in an oven, uniform pressure was applied to the scratched sample by placing it between two glass slides, which were clamped using four binder clips at the middle of each side.

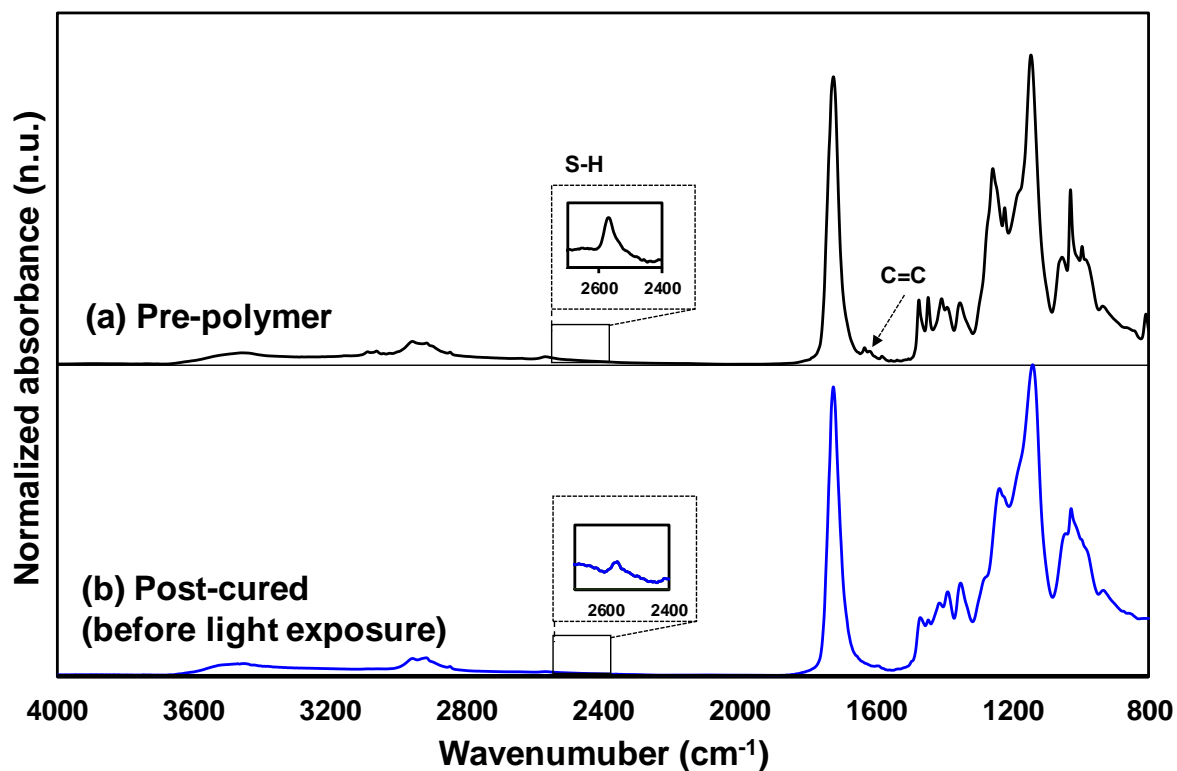

**Fig. S1.** Attenuated total reflection Fourier-transform infrared spectroscopy (ATR-FTIR) spectra of the prepolymer (black) and fully cured (blue) sample with 7 mol% TPS with respect to thiol (or acrylate). The peaks were normalized using the area under the peak corresponding to the ester group at wavenumber from 1850 to 1650 cm<sup>-1</sup>.

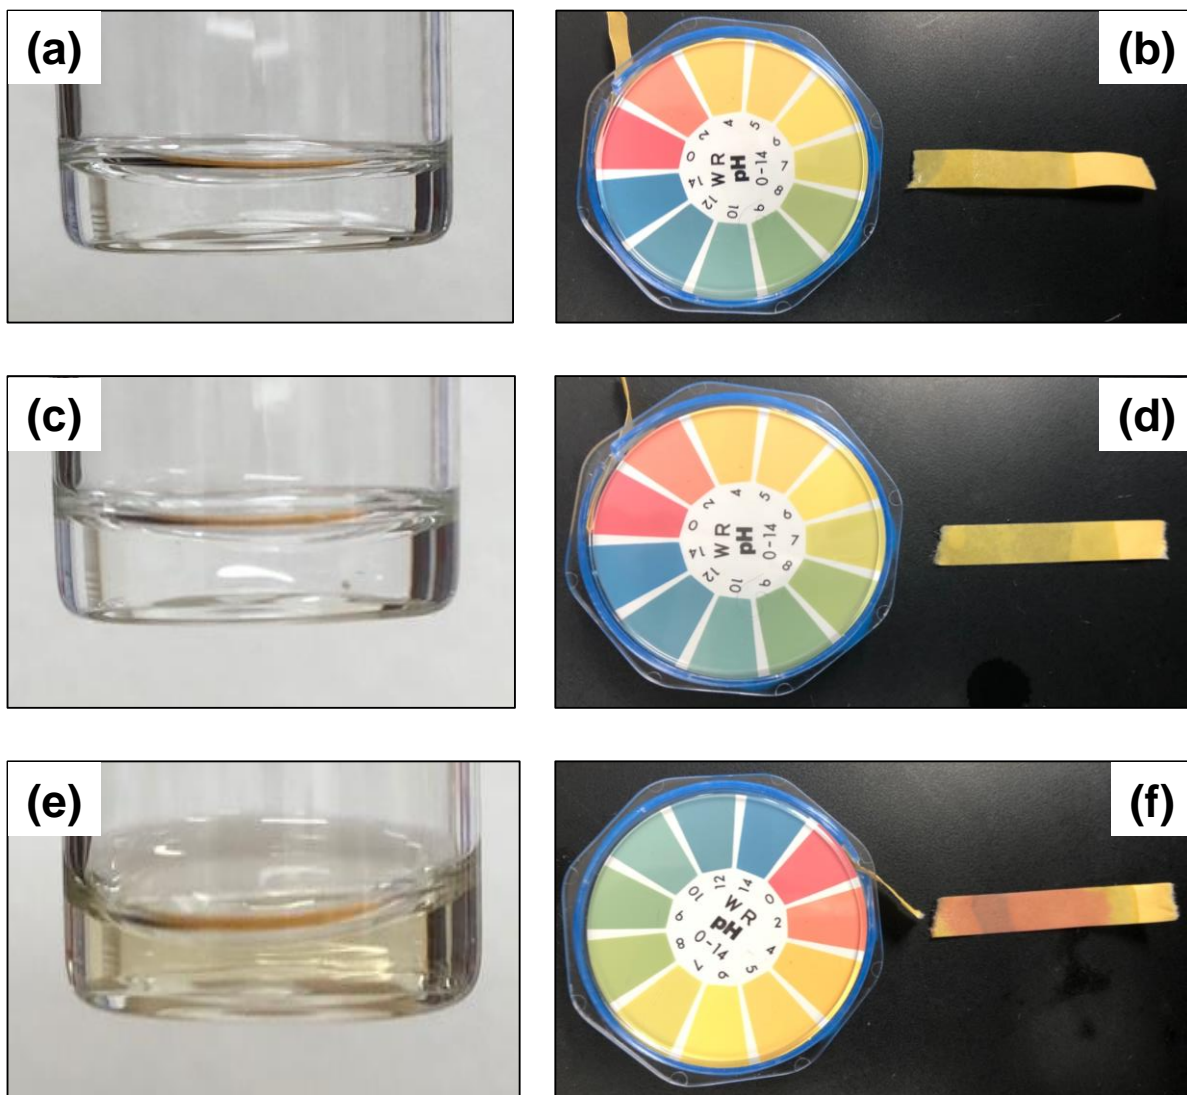

**Fig. S2.** Photographs showing triphenylsulfonium triflate (TPS) solution in acetonitrile (a) as prepared, (c) after annealing at 180 °C for 4 h, and (e) after light exposure. Photographs for pH paper immersed in the corresponding solutions are shown in (b), (d), and (f), respectively. Light exposure dosage using broadband light was 10.2 J/cm<sup>2</sup>. This dosage corresponds to 2 min exposure with a power density of 85 mW/cm<sup>2</sup>.

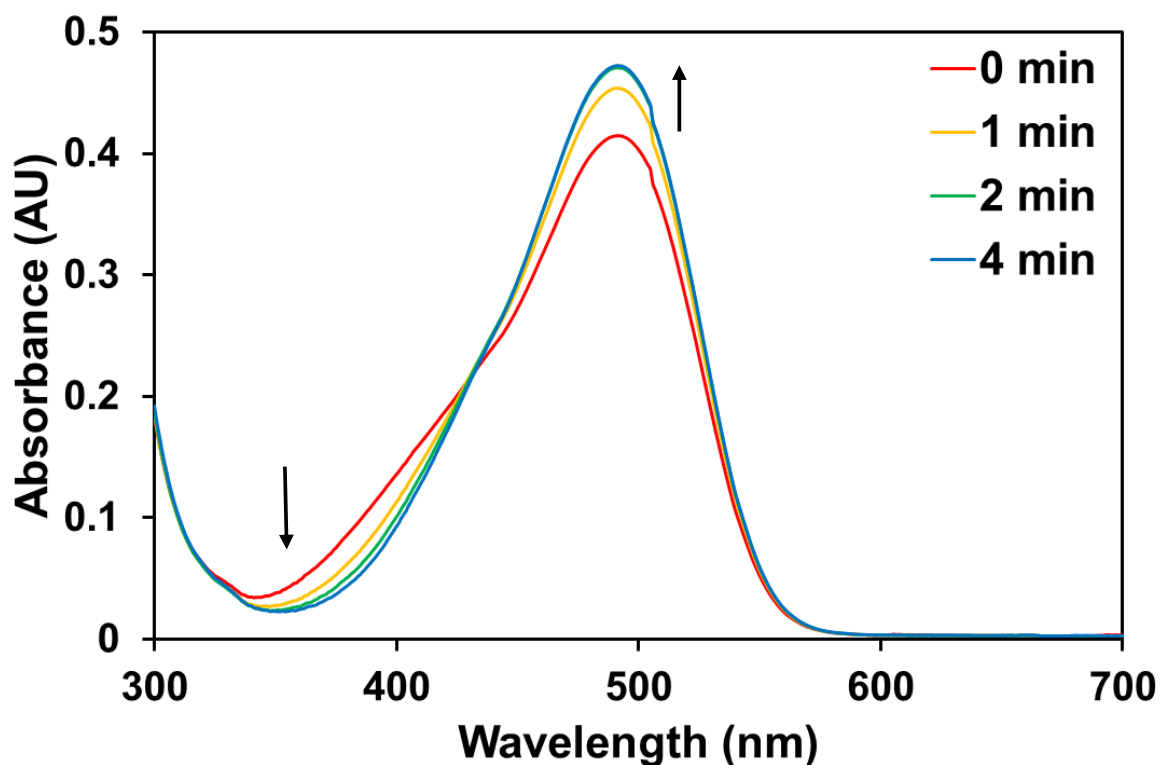

**Fig. S3.** UV-vis absorption spectra for acetonitrile solution with TPS and a pH indicator, methyl red, in an equimolar ratio after various light exposure dosages. Upon light irradiation, absorbance peak  $\sim 370$  nm diminished while peaks at  $\sim 500$  nm intensified. Longer exposure times than 2 mins did not alter the absorbance further, indicating the photochemical reaction of TPS was complete after only 2 min of UV exposure. A broadband microscope illuminator (Omniscure S1500) with output wavelength ranges from 200 to 800 nm was used. A 30 mm working distance was used with a light intensity of  $85 \text{ mW/cm}^2$ . Since TPS absorbs only a fraction of the broadband output, significantly lower doses limited to effective wavelengths (*i.e.*  $\leq 300$  nm) could give an equivalent result.

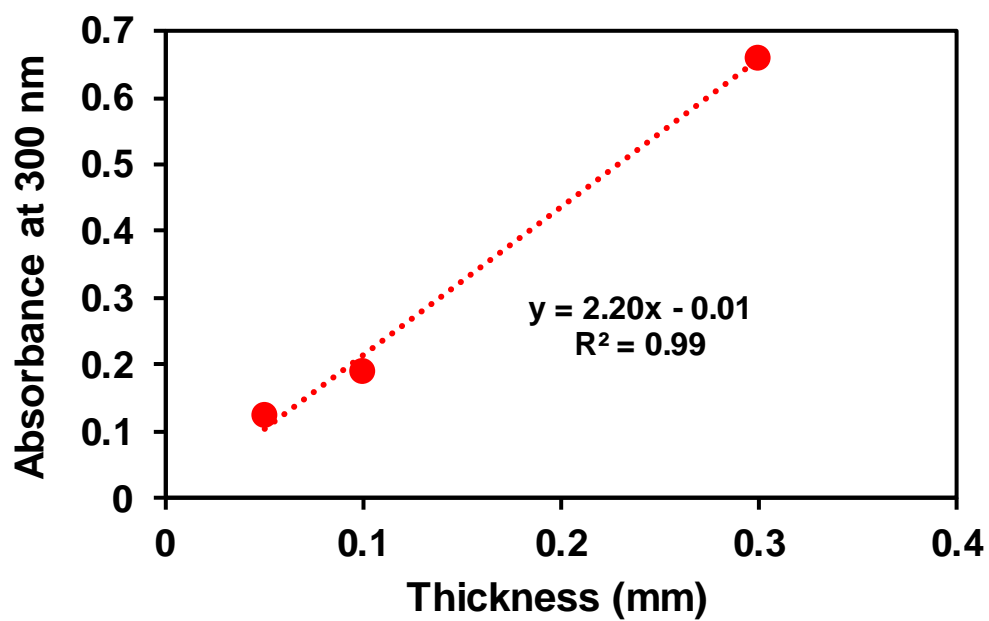

**Fig. S4.** UV-vis absorption at 300 nm for the polymer sample with TPS (7 mol% with respect to acrylate or thiol) at various thicknesses. Red dotted line corresponds to a Beer-Lambert law fit.

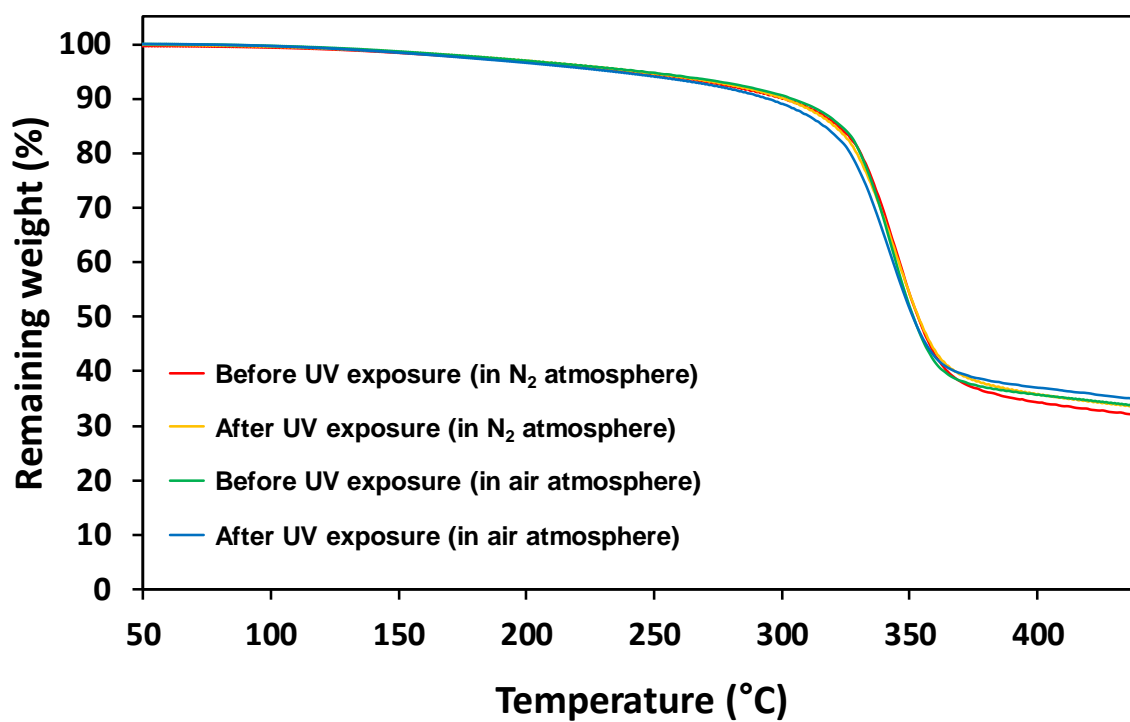

**Fig. S5.** Thermogravimetric analysis (TGA) using samples possessing 7 mol% TPS under either air or nitrogen atmosphere. Each sample before and after light irradiation was measured. Light exposure dosage using broadband light was  $10.2 \text{ J/cm}^2$ . This dosage corresponds to 2 min exposure with power density of  $85 \text{ mW/cm}^2$  measured by radiometer.



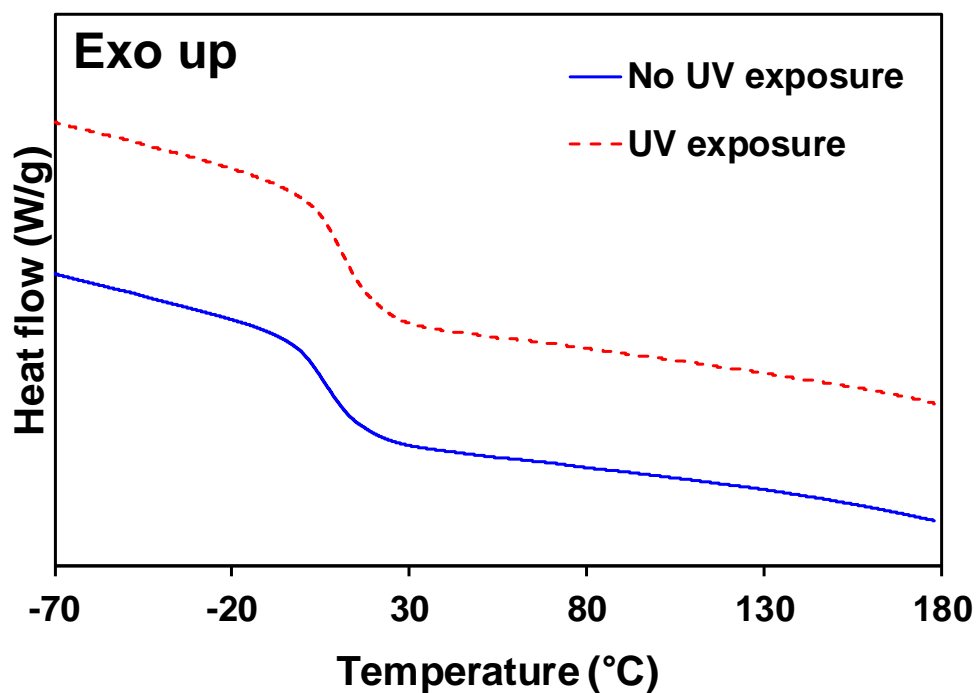

**Fig. S6.** Differential scanning calorimetry (DSC) thermograms for the light-exposed (dashed red line) and unexposed samples (blue solid line) upon second heating at a rate of 10 °C/min. Mid- $T_g$  was determined to be 10 °C for both samples.

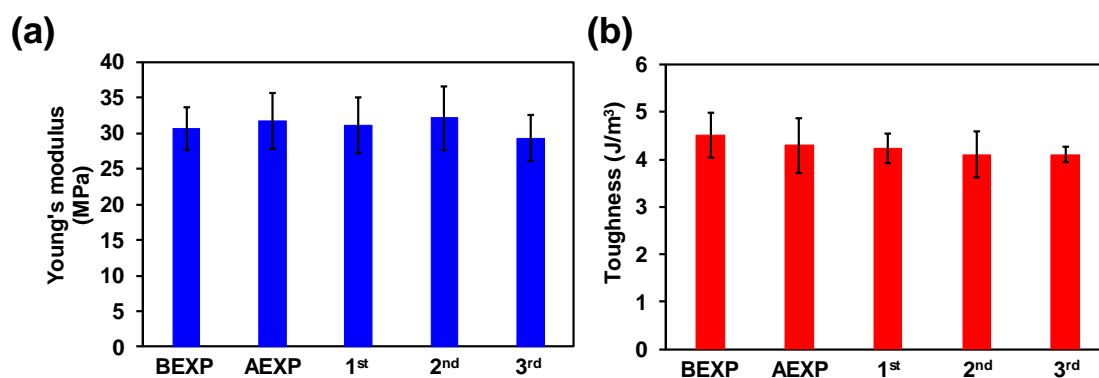

**Fig. S7.** (a) Young's modulus, and (b) toughness for samples before light exposure (BEXP), after light exposure (AEXP), and reprocessed samples after light exposure up to 3<sup>rd</sup> generation. Error bars indicate standard errors from four measurements for each sample.

**Table S1.** Equation parameters used for fitting temperature dependence of the horizontal shift factor  $a_T$

| Sample                | Parameter values                            |                |                        |
|-----------------------|---------------------------------------------|----------------|------------------------|
| Before light exposure | WLF equation                                | $C_1$ (-)      | 10.99                  |
|                       |                                             | $C_2$ (°C)     | 121.31                 |
| After light exposure  | WLF equation<br>( $T \leq 80$ °C)           | $C_1$ (-)      | 16.01                  |
|                       |                                             | $C_2$ (°C)     | 119.38                 |
|                       | Arrhenius equation<br>( $T = 120 - 180$ °C) | $K$ (-)        | $3.31 \times 10^{-23}$ |
|                       |                                             | $E_a$ (kJ/mol) | 142.7                  |

<sup>a</sup> WLF equation form:  $\log a_T = [-C_1(T - T_{ref})]/[C_2 + (T - T_{ref})]$ , where  $T_{ref}$  was set to 70 °C in this study.

<sup>b</sup> Arrhenius equation form:  $a_T = K \exp(E_a/RT)$ , where  $R$  is the gas constant (= 8.314 J/mol·K).

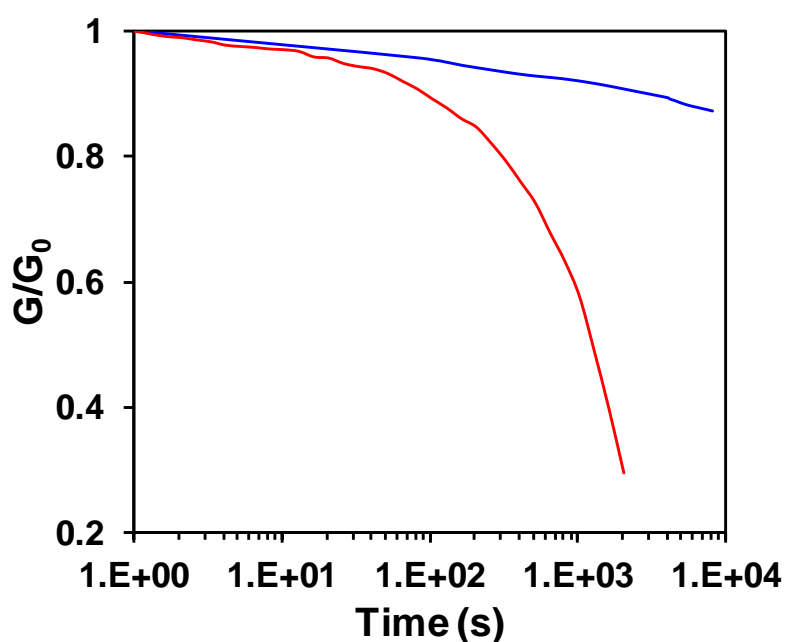

**Fig. S8.** Stress relaxation results for unexposed (blue) and light exposed (red) samples at 130 °C ( $> T_v = 80$  °C) measured by rheometer using 13 mm parallel plate at a 1% strain and at a 10 N axial force.

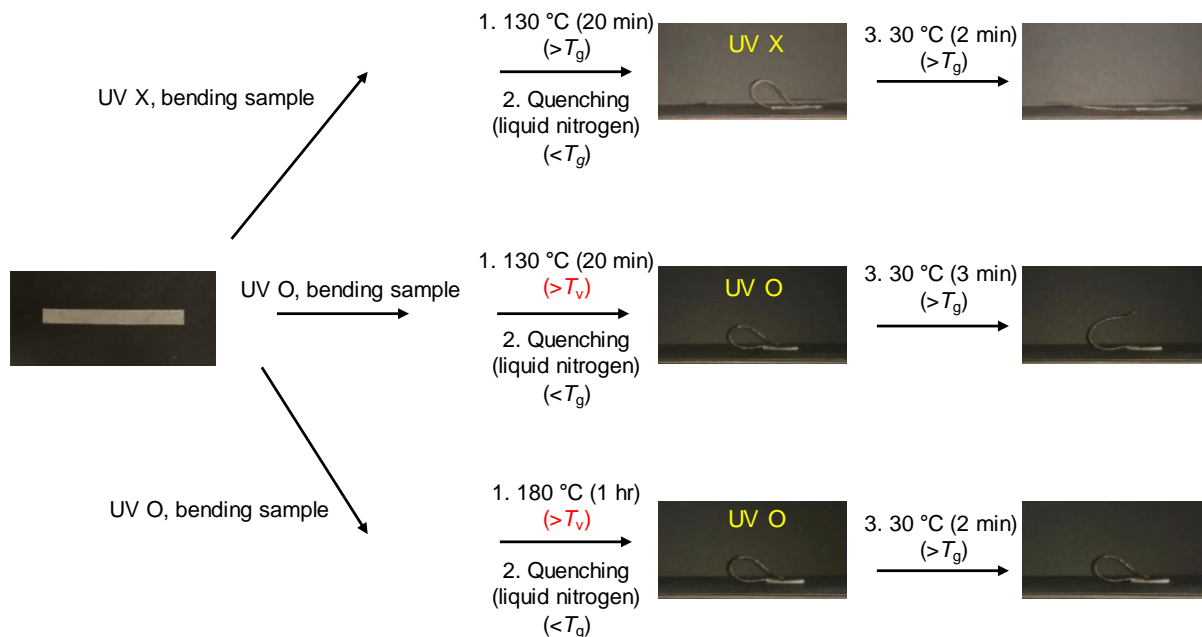

**Fig. S9.** Controlled straightening behavior comparison between unexposed and light exposed samples. Unexposed sample was bent and then annealed at 130 °C (top row). The sample straightened upon subsequent annealing at 30 °C (or above  $T_g$ ). Light exposed samples were bent and then annealed at 130 °C (middle row) and 180 °C (bottom row), respectively. The light exposed samples remained bent even upon subsequent heating at 30 °C (or above  $T_g$ ) owing to the network rearrangement via transesterification. Sufficient post-light exposure annealing at higher temperature resulted in better shape fixity due to the higher degree of network rearrangement.

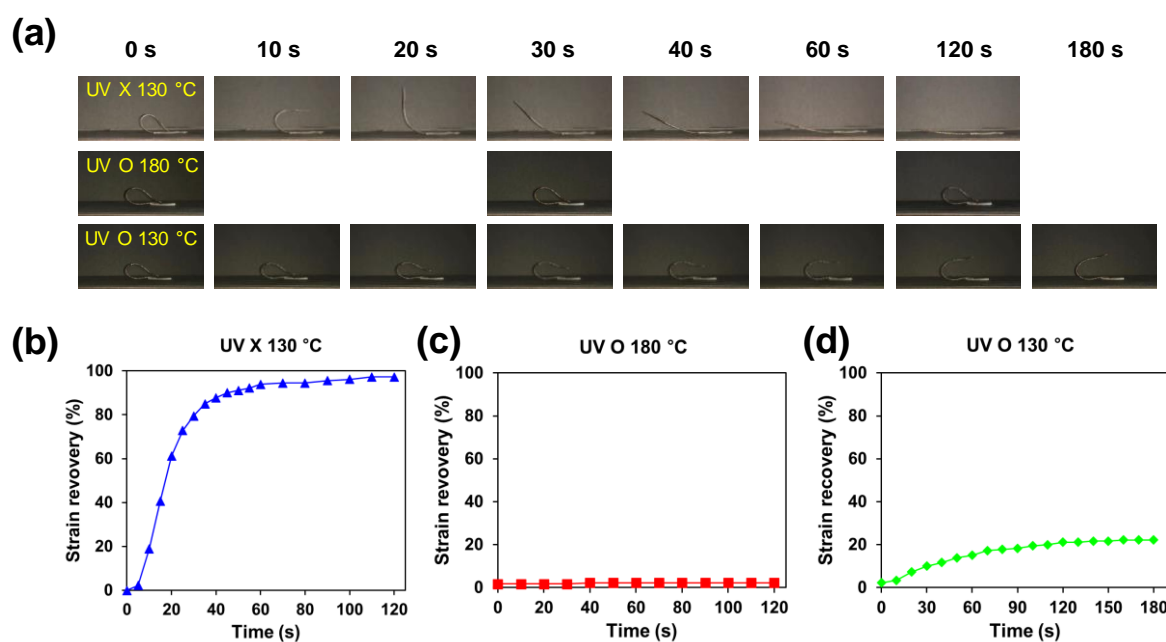

**Fig. S10.** (a) Photographs demonstrating the shape recovery test. The unexposed sample was bent and then annealed at 130 °C (top row), while the light exposed samples were bent followed by annealing at 180 °C (middle row), and 130 °C (bottom row), respectively. Upon final annealing at 30 °C, the strain recovery (%) rate was calculated from the angle recovered over time.<sup>1</sup> (b) Shape recovery rate for the unexposed sample (pre-annealed at 130 °C) as a function of annealing time at 30 °C. (c) Shape recovery rate for the light exposed sample (annealed at 180 °C after light exposure) as a function of annealing time at 30 °C. (d) Shape recovery rate for the light exposed sample (annealed at 130 °C after light exposure) as a function of annealing time at 30 °C. Sufficient post-light exposure annealing at higher temperature resulted in better shape fixity (or lower strain recovery) owing to the higher degree of network rearrangement *via* transesterification.

## Reference

[1] J. Seo, J-W. Choi, Y-H. Koh, J-H. Seo, *ACS Macro Lett.*, 2020, **9**, 389–395.
